# Supplementary material for: The Drosophila neurogenin Tap functionally interacts with the Wnt-PCP pathway to regulate neuronal extension and guidance
Source: Oxford University Press journal article supplement (doi:10.1242/dev.134155), 2016-07-06
Supplement: dev134155supp.pdf [file dev134155supp.pdf]

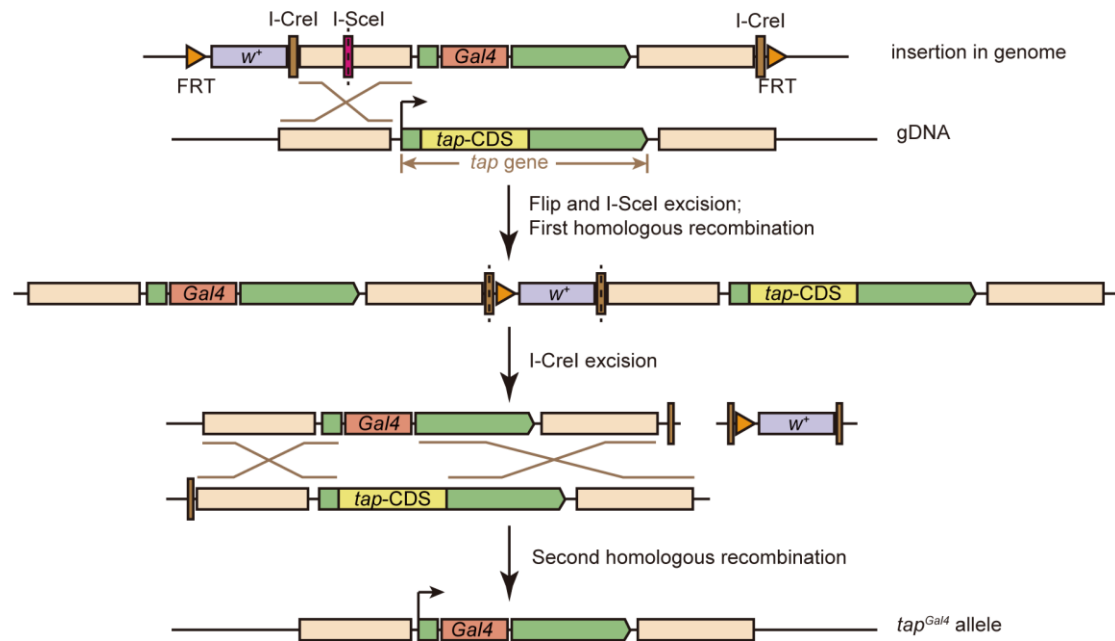

Figure S1 Detailed schematic diagram of generation of *tap<sup>Gal4</sup>* allele.

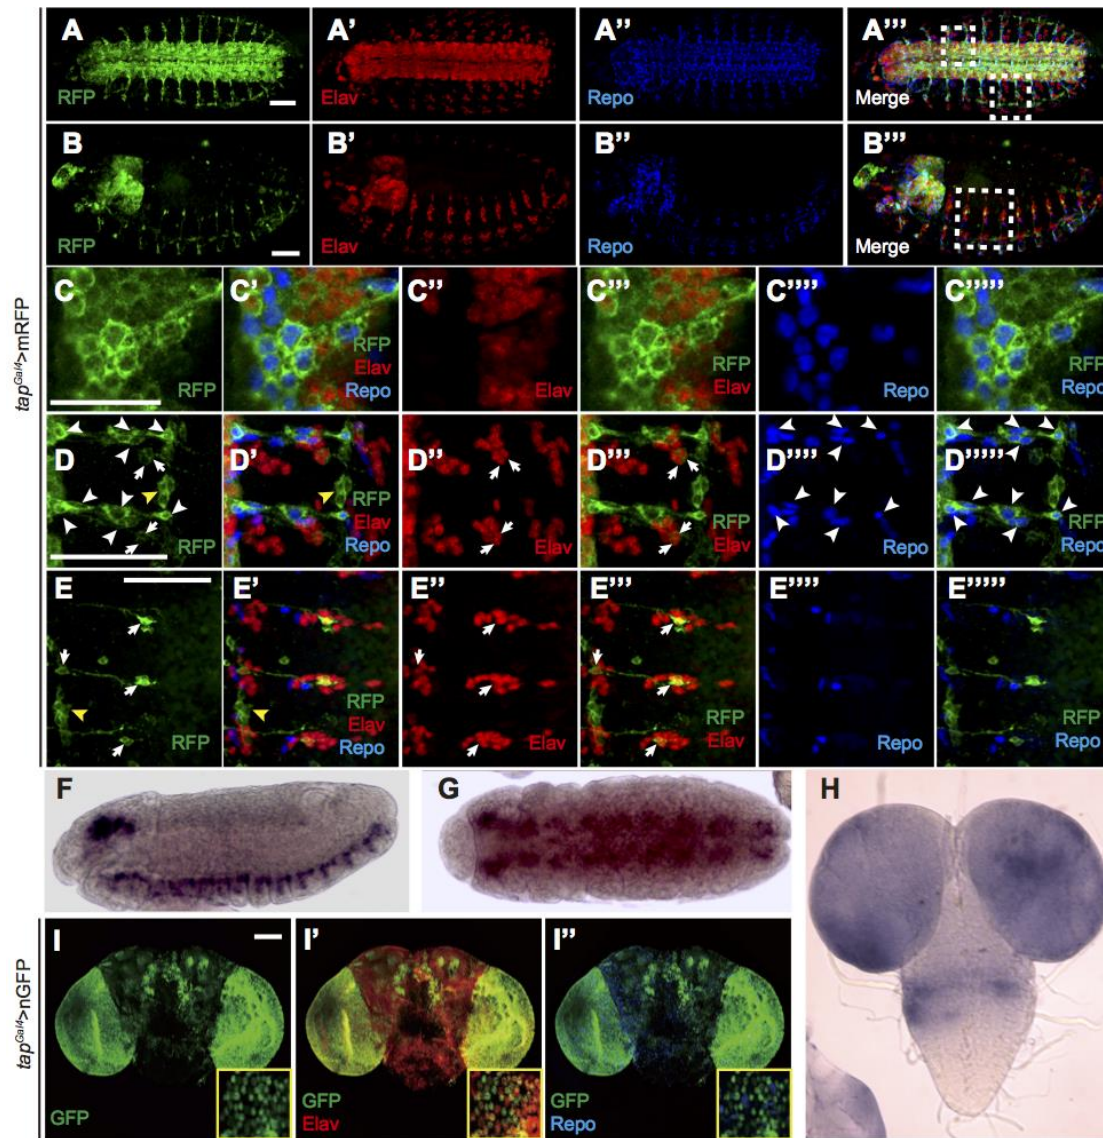

**Figure S2 Tap expression in the nervous system.**

**A-B.** Tap<sup>+</sup> cells co-stain with differentiated neuronal marker (red) or glial marker (blue). **A.** Dorsal view; **B.** Lateral view. **C.** A close look at VNC (the left framed region in A'''). Tap<sup>+</sup> cells overlap with both neuronal and glial regions. **D-E.** Different views of PNS. **D** is magnification of proximal PNS (right framed region in A'''). **E** is magnification of distal PNS (framed region in B'''). White arrows: Tap<sup>+</sup> cells overlap with Elav only; white arrowheads: Tap<sup>+</sup> cells overlap with Repo only; yellow arrowhead: Tap<sup>+</sup> cells which are neither neurons nor glia. **F-H.** *In situ* hybridization of *tap*. **F.** Lateral view of a stage 14 embryo. **G.** Dorsal view. **H.** L3 brain. **I.** Tap is expressed in neurons (I') but not glia cells (II') at adult stage. Scale bar=50  $\mu$ m.

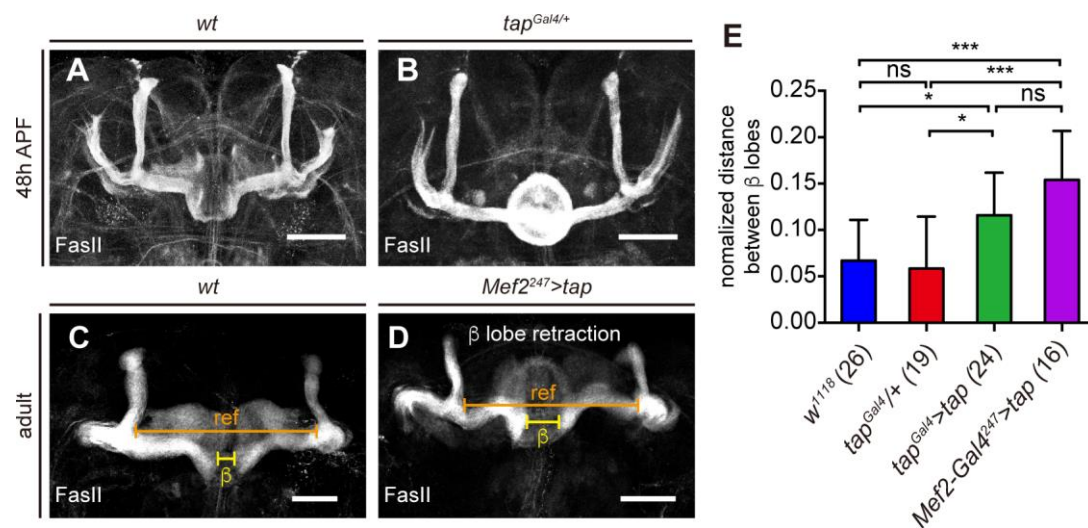

**Figure S3 Tap regulates axonal growth and guidance during development.**

**A-B.** Tap is required for the axonal growth at early stages during metamorphosis. Compared to the wild-type MB (**A**), the midline-crossing defect of  $\beta$  lobes in *tap* mutant was observed at early pupal stages (**B**). **C-E.** Ectopic expression of Tap increases the distance between contralateral  $\beta$  lobes. The normalized  $\beta$  distance in **E** is calculated by the gap between  $\beta$  lobes (yellow line in **C**, **D**) divided by the distance between two peduncles (orange line in **C**, **D**). Numbers of the brains being analysed were indicated in the bracket. Error bars represent the S.D.. ns: not significant; \*:  $p < 0.05$ ; \*\*\*:  $p < 0.001$ , One-way ANOVA test, Turkey correction. Scale bar=50  $\mu$ m.

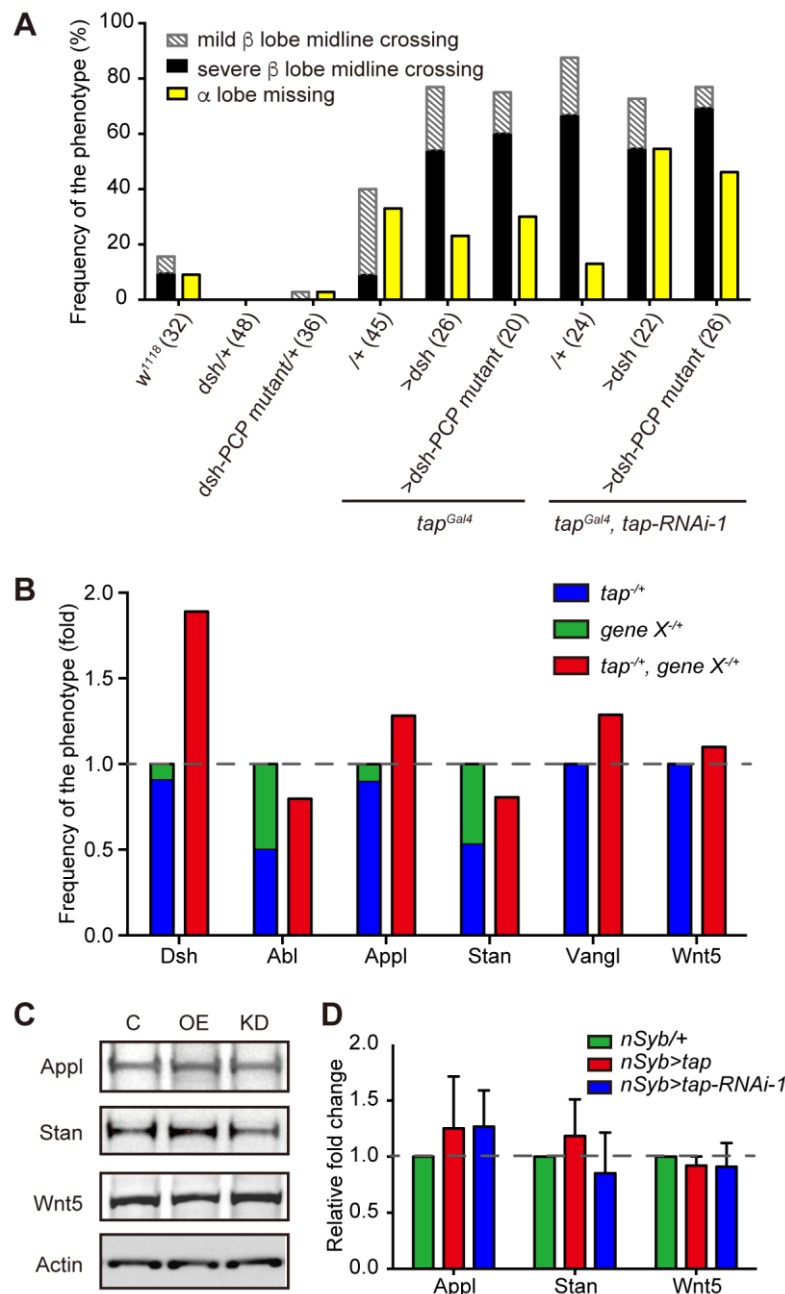

**Figure S4 Tap does not interact with the ligands and receptors in PCP pathway.**

**A.** Ectopic expression of Dsh in *tap* loss of function conditions enhances the  $\beta$  lobe overgrowth defect. Numbers of the brains analysed are indicated in the bracket. **B.** Double heterozygous mutant screen of the protein in PCP signalling for the defects in MB. The penetrance of total  $\beta$  lobe overgrowth defect was normalized to the sum of the penetrance of *tap* mutant plus the mutant of PCP genes. Dashed line indicates 1, which represents the normalized defect severity aggregated by the two single mutants. **C.** Western blot analysis showing the protein levels of some PCP components in

driver alone (C), Tap overexpression (OE) or knockdown (KD) cases. Actin is used as a loading control. **D.** Quantification of relative changes in protein levels of PCP components when OE or KD Tap, normalized by control. Error bars represent the S.D., n=3.

## Supplemental Materials and Methods

### Fly Husbandry and Transgenic Lines

Flies were kept at 25°C or 29°C on standard medium. Experiments involving RNAi technique, or genetic interaction were performed at 29°C, and the others were performed at 25°C. The following lines were obtained from the Bloomington Drosophila Stock Center (BL): *dpp-Gal4/TM6B* (1553), *UAS-mCD8::GFP* (L. Luo), *UAS-mCD8::mRFP* (27398), *nSyb-Gal4* (51914), *UAS-Stinger2* (J. Posakony), *Mef2-Gal4<sup>247</sup>* (50742), *UAS-dsh.myc* (9453), *UAS-dsh.myc-DEP domain mutant* (9525). The following lines were obtained from the Vienna Drosophila RNAi Center (VDRC): *UAS-tap-RNAi-1* (110705), *UAS-tap-RNAi-2* (12638). For gain-of-function analyses, the following strains were generated: *UAS-mNgn1*, *UAS-ato*, *UAS-tap-GFP*. For loss-of-function analyses in embryo stages, the following strain was generated: *UAS-mCD8-RFP; tap<sup>Gal4</sup>/TM6B, Dfd-EYFP*. For MARCM experiments, flies of *hsFlp, UAS-mCD8::GFP/FM7; FRT2A, tub-Gal80/TM6C; ey<sup>OK107</sup>* were crossed with (1) *FRT2A*; (2) *FRT2A, tap<sup>Gal4</sup>/TM6C*; (3) *UAS-tap/CyO; FRT2A, tap<sup>Gal4</sup>/TM6C* flies. The progenies were heat-shocked at 37°C for 1 hour during 0-24h APF, and shifted back to 25°C. The mutants for genetic interaction screen were the following: *Dsh<sup>6</sup>/FM7* (BL5297), *Dsh<sup>1</sup>* (BL5298), *Drl<sup>Red2</sup>*, *Slit<sup>2</sup>/CyO* (BL3266), *Dscam1<sup>21</sup>* (D. Schmucker), *Abl<sup>4</sup>/TM6B*, *Appl<sup>d</sup>*, *Stan<sup>E59</sup>/CyO* (BL41776), *Vang<sup>stbm-6</sup>* (BL6918) and *Wnt5<sup>400</sup>* (J. Noordermeer).

### Cloning and gene targeting

The fragments of 5' homologous recombination arm of *tap* ORF, Gal4 and 3' recombination arm of *tap* ORF were amplified using the primers below: F1: GTACGGTACCGCTAGCAATGGAGCAAATGGAACGAC, R1: GTACTCTAGACCTAGGATTGTAGCAGGCGGCCATGA, F2: GTACCCTAGGATGAAGCTACTGTCTTCTATCGAACAAG; R2: GTACCCTAGGTTACTCTTTTTTTGGGTTTGGTGG, F3: ACGTACCCTAGGCACAGTTTTGTGGGCCAAACTAC, R3: GTACGCGGCCCGCCATGAAACCGTTGTTTTGACG, and cloned into pED13(M) vector (gifted from B. Dickson lab). *tap* targeting was achieved by ends-in homologous recombination described in Fig. S1 and (Rong and Golic, 2000).

## Immuohistochemistry

Embryos and dissected tissues were stained using the protocol described in (Hassan et al., 2000; Langen et al., 2013). Flat preparation of embryonic fillets at stage 17 were generated and stained on polylysine-coated glass following the protocol described in (Featherstone et al., 2009). Primary and secondary antibodies were diluted as follows: rabbit anti-GFP 1:500 (Invitrogen A-11122), guinea pig anti-Sens 1:1000 (gifted from H. Bellen lab (Nolo et al., 2000)), rabbit anti-Ngn1 1:250 (gifted from H. Bellen lab), rabbit anti-Ato 1:1000 (generated in house (Quan et al., 2004)), mouse anti-Futsch 1:100 (Hybridoma Bank 22C10), rat anti-CadN 1:20 (Hybridoma Bank DN-Ex #8), rabbit anti-DsRed 1:500 (Clontech 632496), rat-Elav 1:100 (Hybridoma Bank 7E8A10), mouse anti-Repo 1:10 (Hybridoma Bank 8D12), mouse anti-FasII 1:50 (Hybridoma Bank 1D4), Alexa 488, 555, and 647 coupled secondary antibodies 1:500 (Invitrogen). Pictures were acquired using either LEICA TCS SP8 or LEICA TCS SP5 and processed with ImageJ.

## Western blot

Proteins from 20 adult fly brains in each genotype were resolved and probed using the protocol described in (Okroy et al., 2015). Primary antibodies were used as: rat anti-Dsh 1:1000 (gifted from T. Uemura lab (Srahna et al., 2006)), mouse anti-Actin 1:5000 (Abcam ab8227), rabbit anti-App-C-term 1:100 (a gift from B. De Strooper (Soldano et al., 2000)), mouse anti-Stan 1:100 (Hybridoma Bank Flamingo #74) and rabbit anti-Wnt5 1:250 (a gift from L. Fradkin).



- Featherstone, D. E., Chen, K. and Broadie, K.** (2009). Harvesting and preparing *Drosophila* embryos for electrophysiological recording and other procedures. *J Vis Exp*.
- Hassan, B. and Vaessin, H.** (1997). Daughterless is required for the expression of cell cycle genes in peripheral nervous system precursors of *Drosophila* embryos. *Dev Genet* **21**, 117-122.
- Hassan, B. A., Bermingham, N. A., He, Y., Sun, Y., Jan, Y. N., Zoghbi, H. Y. and Bellen, H. J.** (2000). atonal regulates neurite arborization but does not act as a proneural gene in the *Drosophila* brain. *Neuron* **25**, 549-561.
- Langen, M., Koch, M., Yan, J., De Geest, N., Erfurth, M. L., Pfeiffer, B. D., Schmucker, D., Moreau, Y. and Hassan, B. A.** (2013). Mutual inhibition among postmitotic neurons regulates robustness of brain wiring in *Drosophila*. *Elife* **2**, e00337.
- Li, W., Prazak, L., Chatterjee, N., Gruninger, S., Krug, L., Theodorou, D. and Dubnau, J.** (2013). Activation of transposable elements during aging and neuronal decline in *Drosophila*. *Nat Neurosci* **16**, 529-531.
- Nolo, R., Abbott, L. A. and Bellen, H. J.** (2000). Senseless, a Zn finger transcription factor, is necessary and sufficient for sensory organ development in *Drosophila*. *Cell* **102**, 349-362.
- Okray, Z., de Esch, C. E., Van Esch, H., Devriendt, K., Claeys, A., Yan, J., Verbeeck, J., Froyen, G., Willemsen, R., de Vrij, F. M., et al.** (2015). A novel fragile X syndrome mutation reveals a conserved role for the carboxy-terminus in FMRP localization and function. *EMBO Mol Med* **7**, 423-437.
- Quan, X. J., Denayer, T., Yan, J., Jafar-Nejad, H., Philippi, A., Lichtarge, O., Vleminckx, K. and Hassan, B. A.** (2004). Evolution of neural precursor selection: functional divergence of proneural proteins. *Development* **131**, 1679-1689.
- Rong, Y. S. and Golic, K. G.** (2000). Gene targeting by homologous recombination in *Drosophila*. *Science* **288**, 2013-2018.
- Srahna, M., Leyssen, M., Choi, C. M., Fradkin, L. G., Noordermeer, J. N. and Hassan, B. A.** (2006). A signaling network for patterning of neuronal connectivity in the *Drosophila* brain. *PLoS Biol* **4**, e348.
